# Supplementary material
Source: PubMed Central journal article supplement (PMC6180907)
Supplement: NIHMS990830-supplement-supporting_info.pdf [file NIHMS990830-supplement-supporting_info.pdf]

## Supporting Information

### Stereoselective Synthesis of Bicyclo[6.1.0]nonene Precursors of the Bioorthogonal Reagents sTCO and BCN

Jessica G. K. O'Brien, Srinivasa Chintala, Joseph M. Fox\*

Brown Laboratories, Department of Chemistry and Biochemistry, University of Delaware, Newark, Delaware, 19716, USA

#### Table of Contents

|                                                                      |      |
|----------------------------------------------------------------------|------|
| <sup>1</sup> H NMR of <b>3-syn</b>                                   | S-2  |
| <sup>13</sup> C NMR of <b>3-syn</b>                                  | S-3  |
| <sup>1</sup> H NMR of <b>3-anti</b>                                  | S-4  |
| <sup>13</sup> C NMR of <b>3-anti</b>                                 | S-5  |
| <sup>1</sup> H NMR of <b>5</b>                                       | S-6  |
| <sup>13</sup> C NMR of <b>5</b>                                      | S-7  |
| <sup>1</sup> H NMR of <b>6</b>                                       | S-8  |
| <sup>13</sup> C NMR of <b>6</b>                                      | S-9  |
| <sup>1</sup> H NMR of <b>4</b>                                       | S-10 |
| <sup>13</sup> C NMR of <b>4</b>                                      | S-11 |
| <sup>1</sup> H NMR ( <i>S</i> )- <b>BHTL</b>                         | S-12 |
| <sup>13</sup> C NMR of ( <i>S</i> )- <b>BHTL</b>                     | S-13 |
| <sup>1</sup> H NMR of <b>Rh<sub>2</sub>(S-BHTL)<sub>4</sub></b>      | S-14 |
| <sup>13</sup> C NMR of <b>Rh<sub>2</sub>(S-BHTL)<sub>4</sub></b>     | S-16 |
| X-ray Crystal Structure of <b>Rh<sub>2</sub>(S-BHTL)<sub>4</sub></b> | S-17 |

$^1\text{H}$  NMR spectrum of **3-syn** (400 MHz,  $\text{CDCl}_3$ )

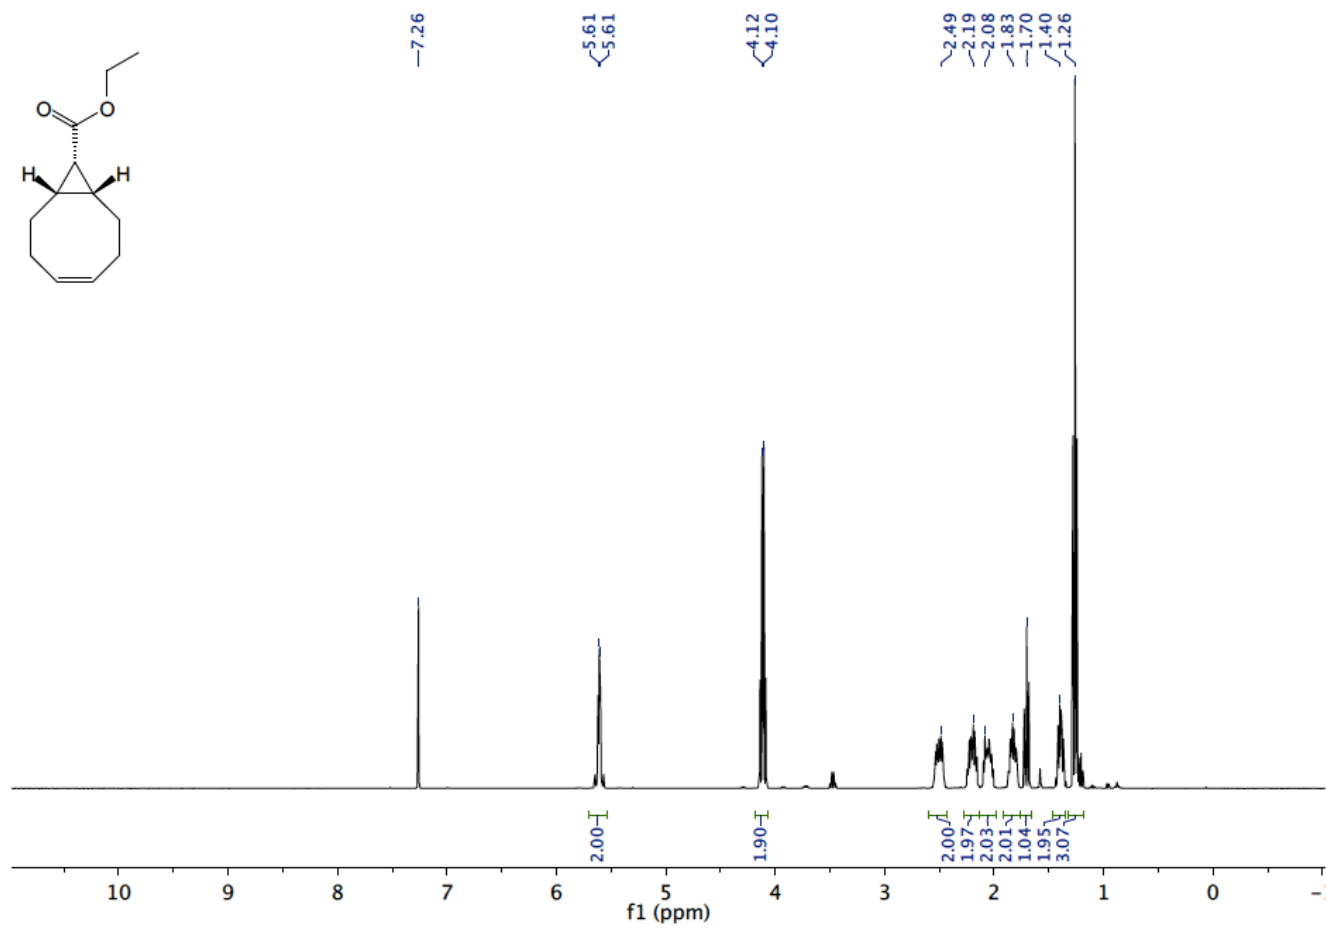

<sup>13</sup>C NMR spectrum of **3-syn** (150 MHz, CDCl<sub>3</sub>)

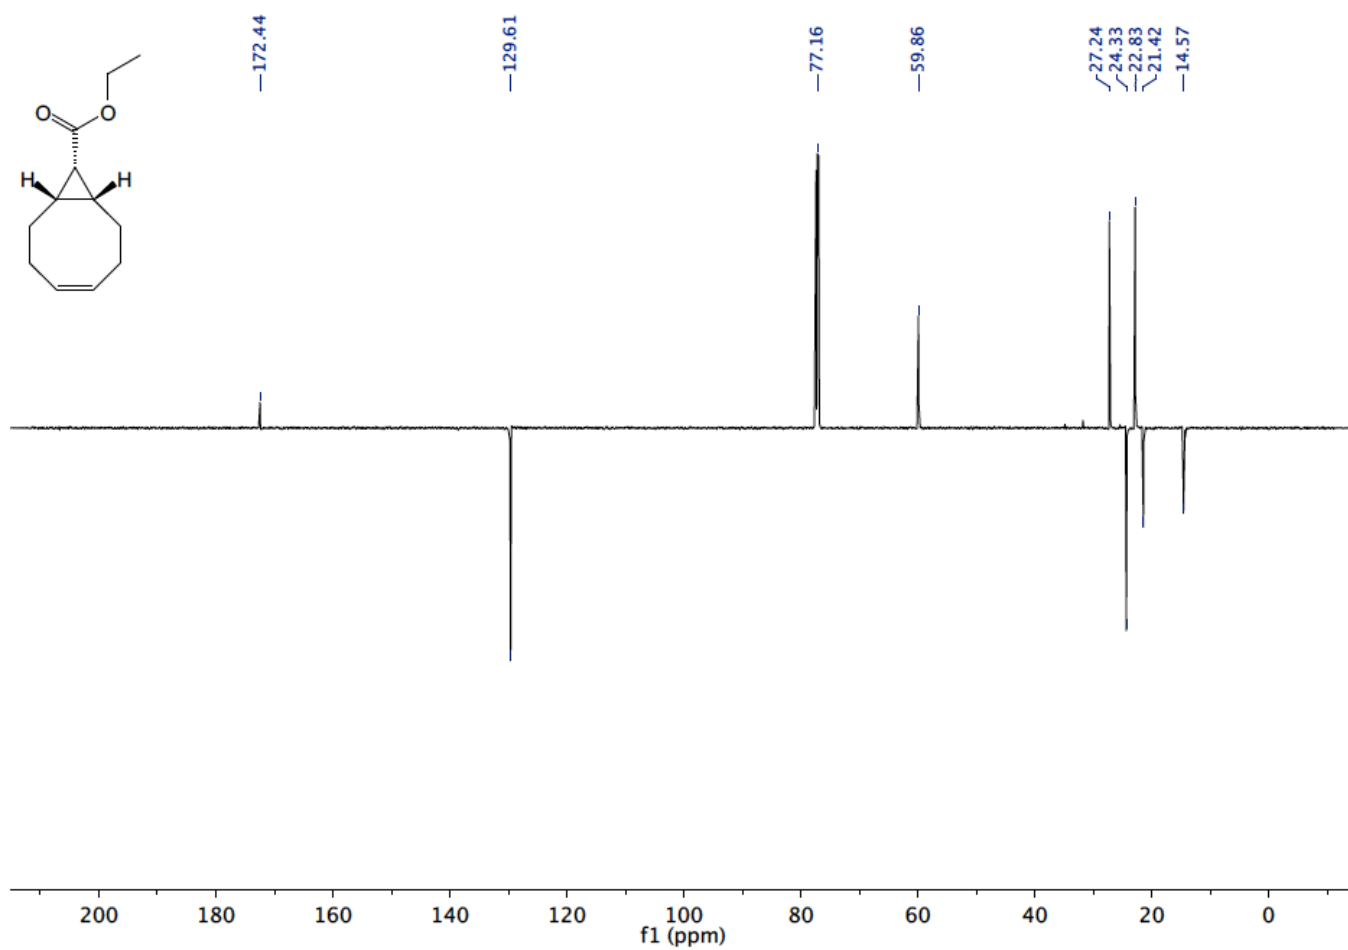

$^1\text{H}$  NMR spectrum of **3-anti** (600 MHz,  $\text{CDCl}_3$ )

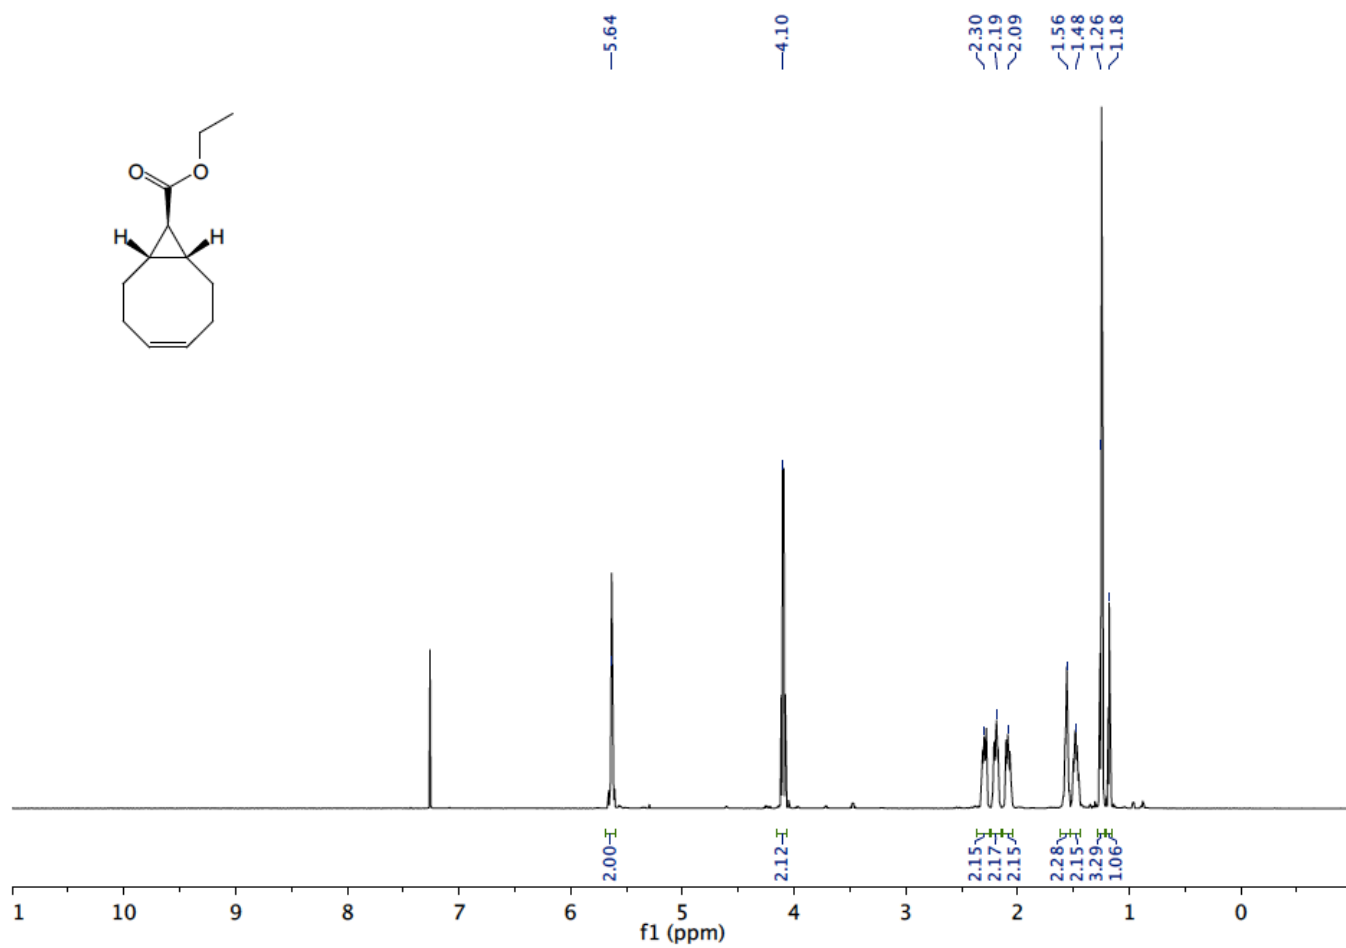

$^{13}\text{C}$  NMR spectrum of **3-anti** (150 MHz,  $\text{CDCl}_3$ )

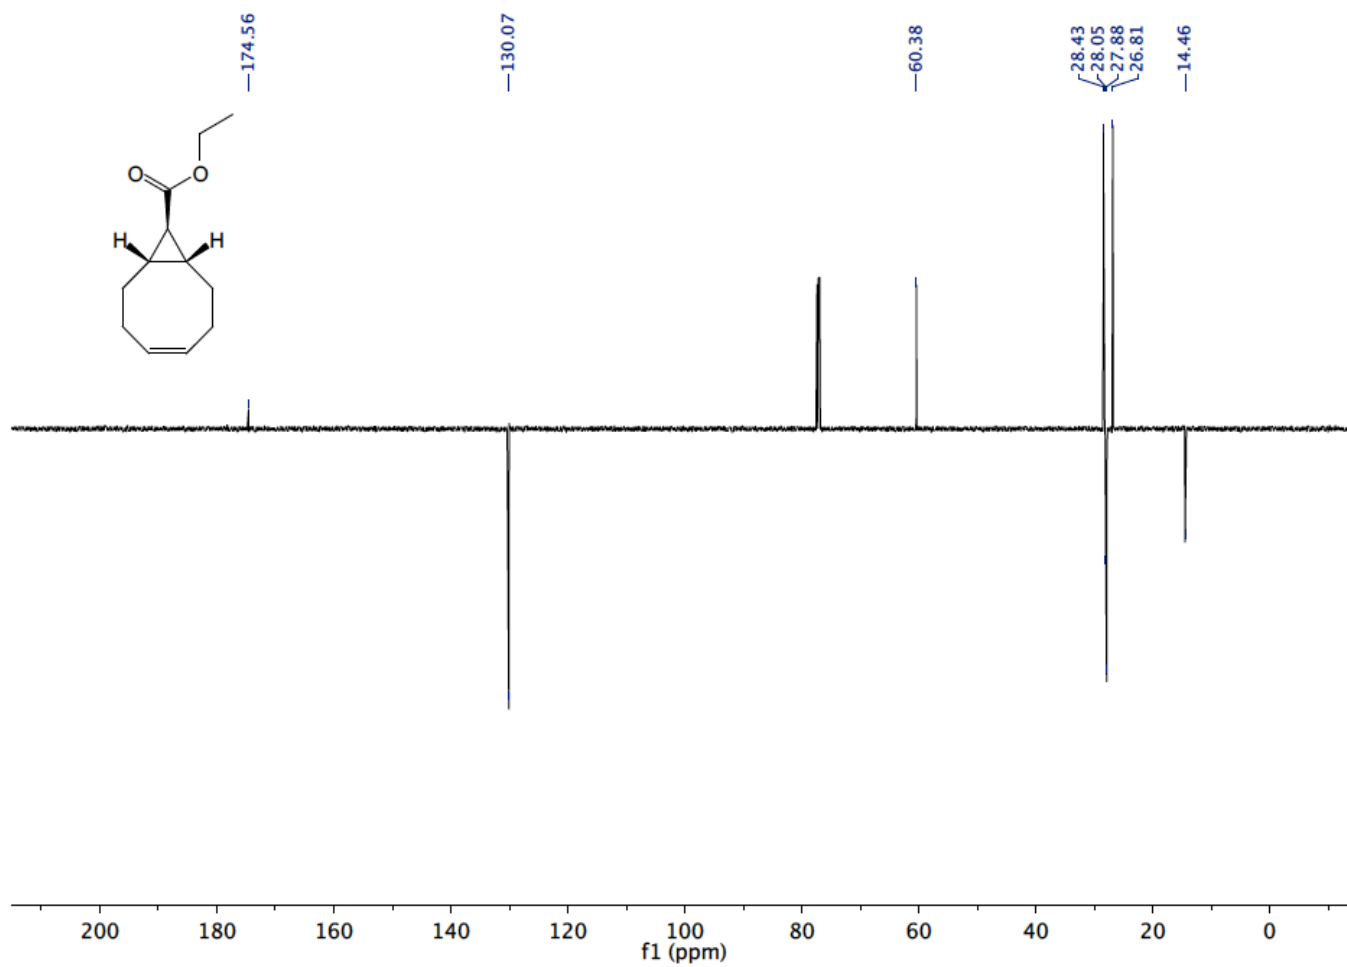

<sup>1</sup>H NMR spectrum of **5** (600 MHz, CDCl<sub>3</sub>)

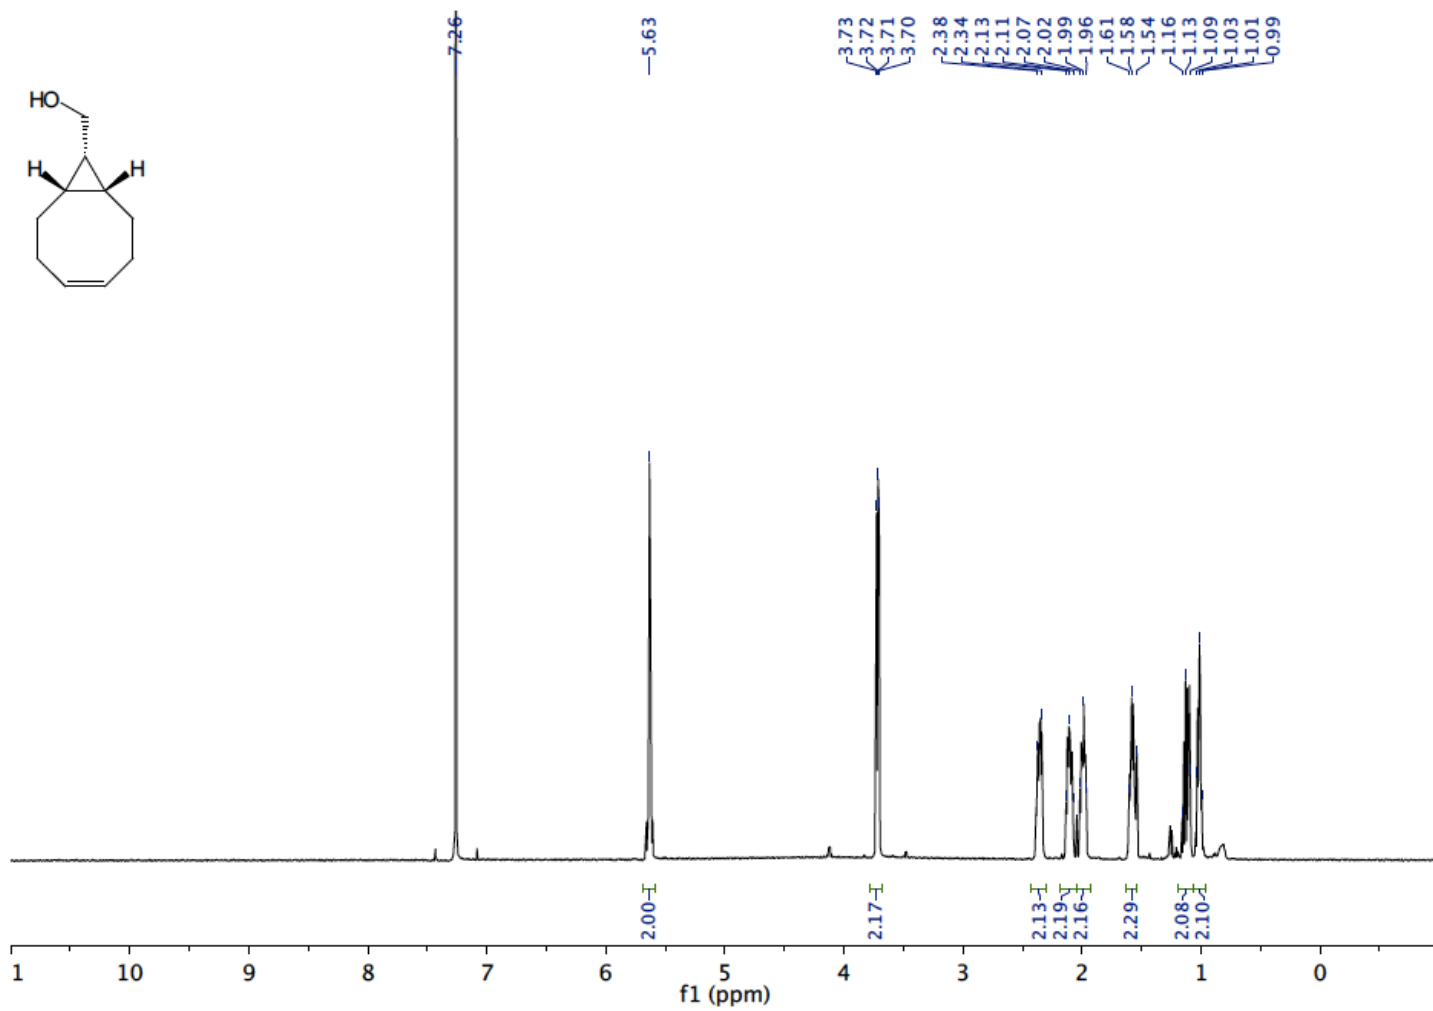

<sup>13</sup>C NMR spectrum of **5** (150 MHz, CDCl<sub>3</sub>)

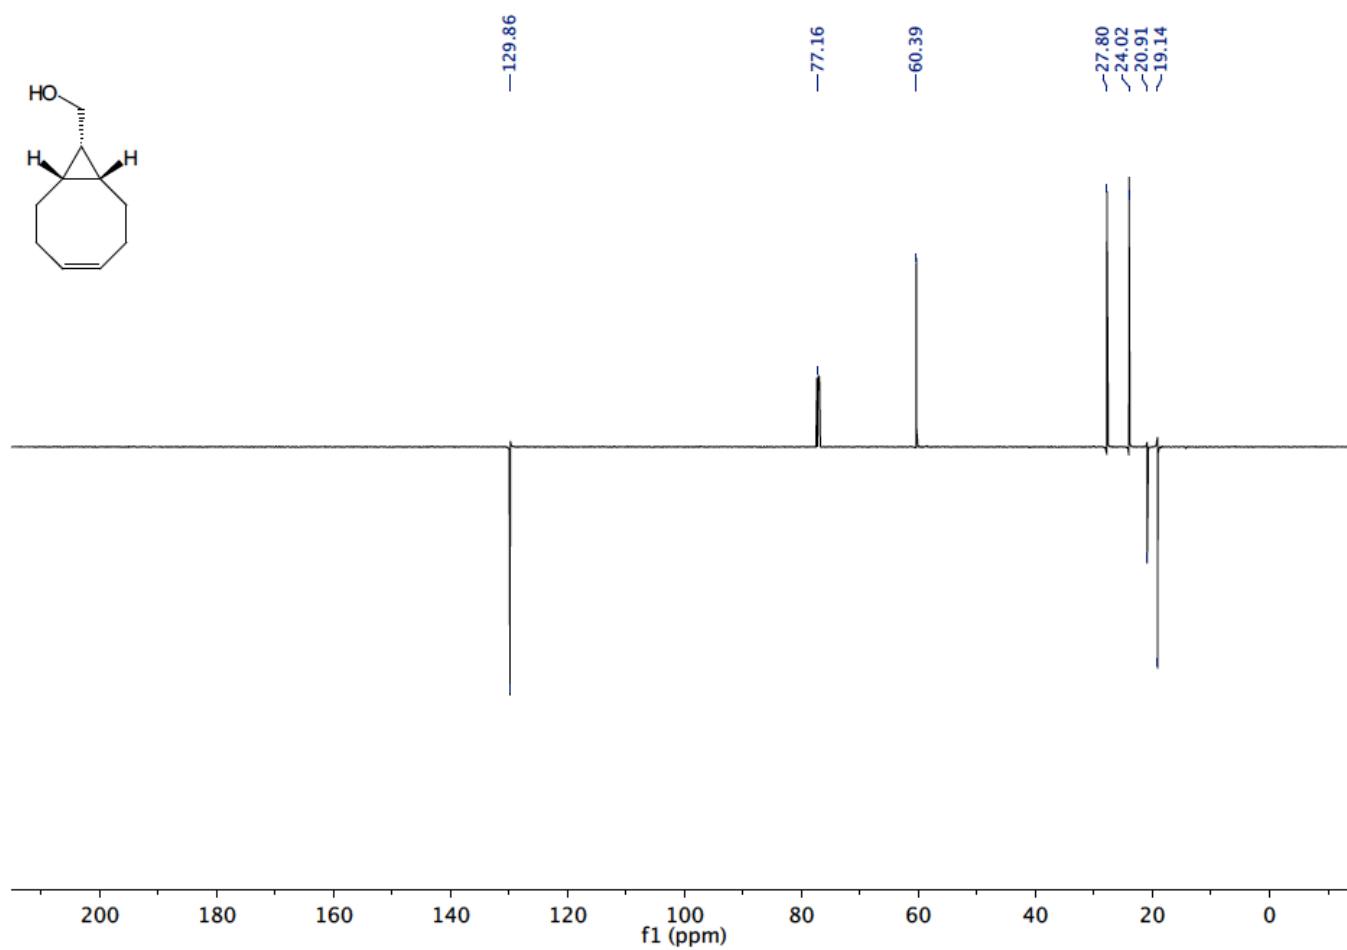

$^1\text{H}$  NMR spectrum of **6** (600 MHz,  $\text{CDCl}_3$ )

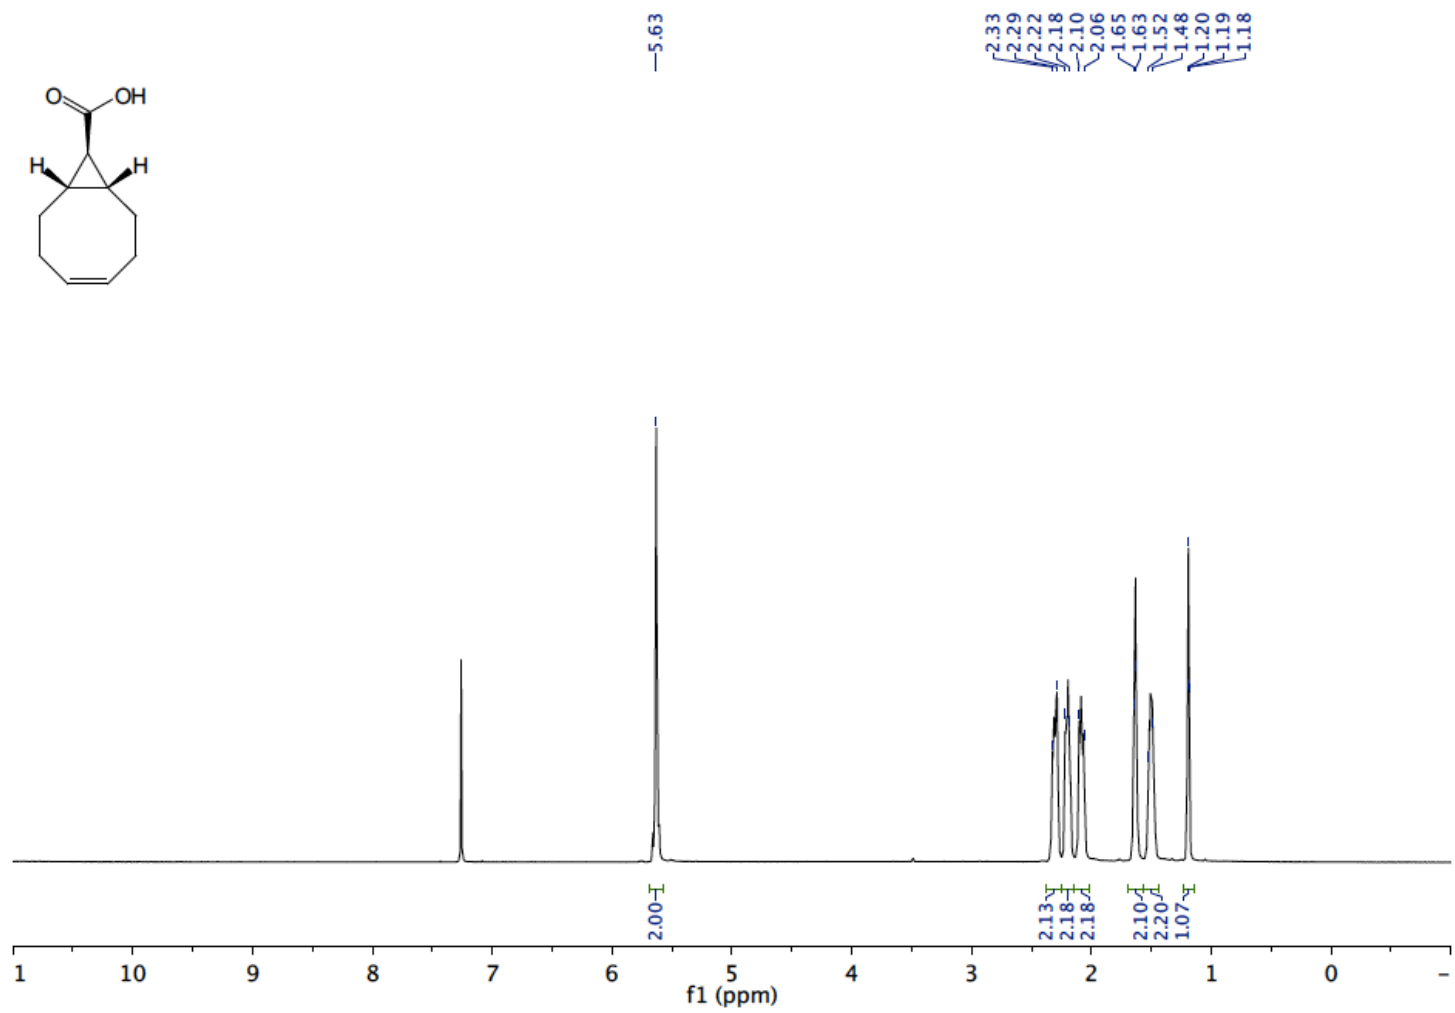



$^{13}\text{C}$  NMR spectrum of **6** (150 MHz,  $\text{CDCl}_3$ )

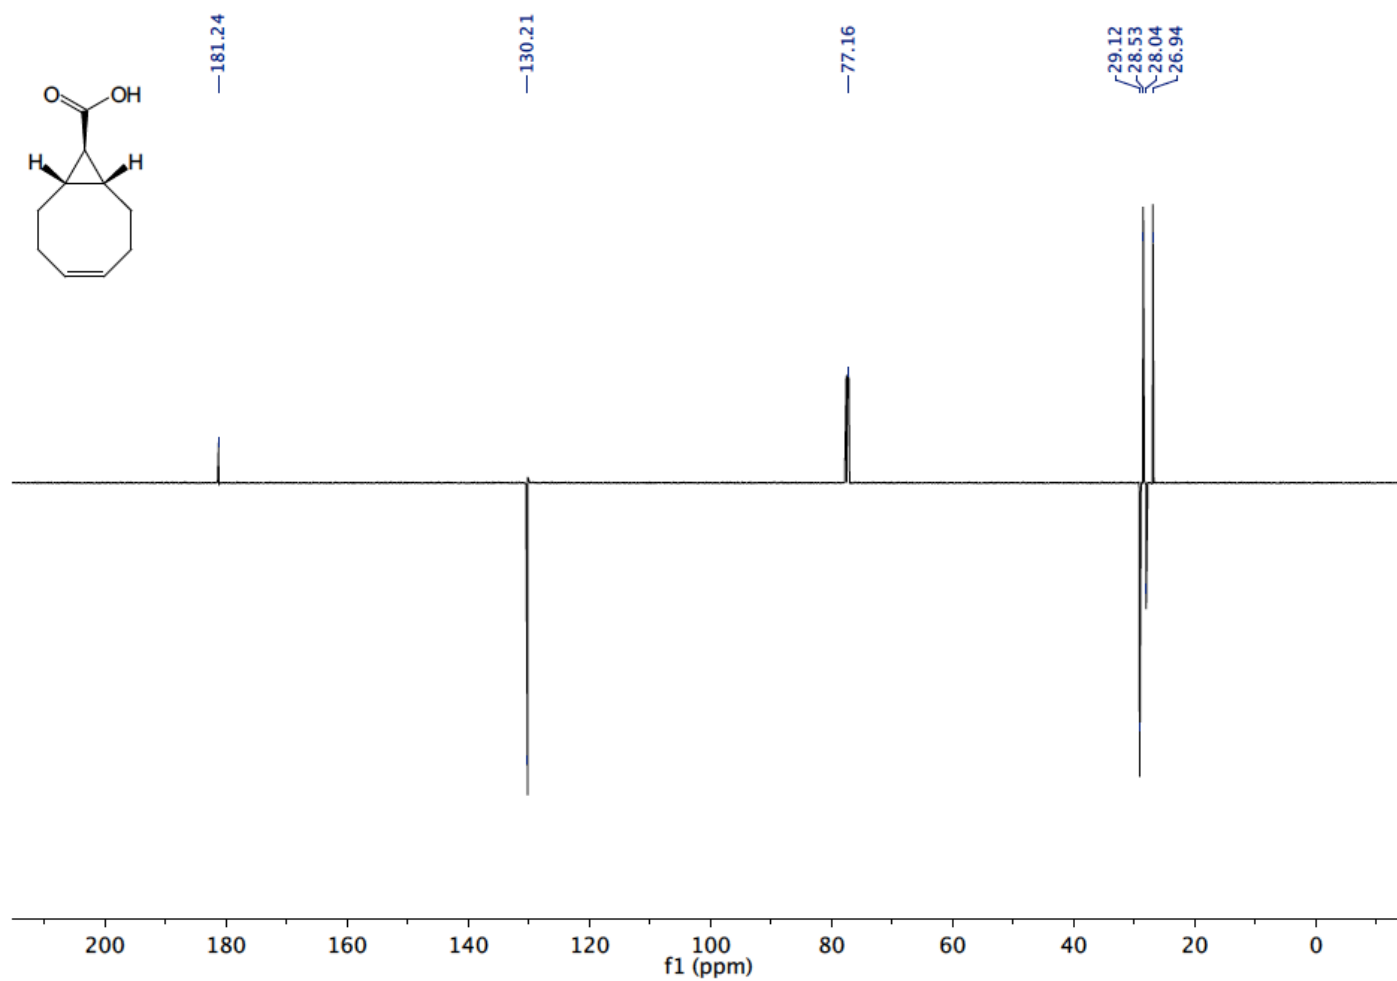

<sup>1</sup>H NMR spectrum of **4** (600 MHz, CDCl<sub>3</sub>)

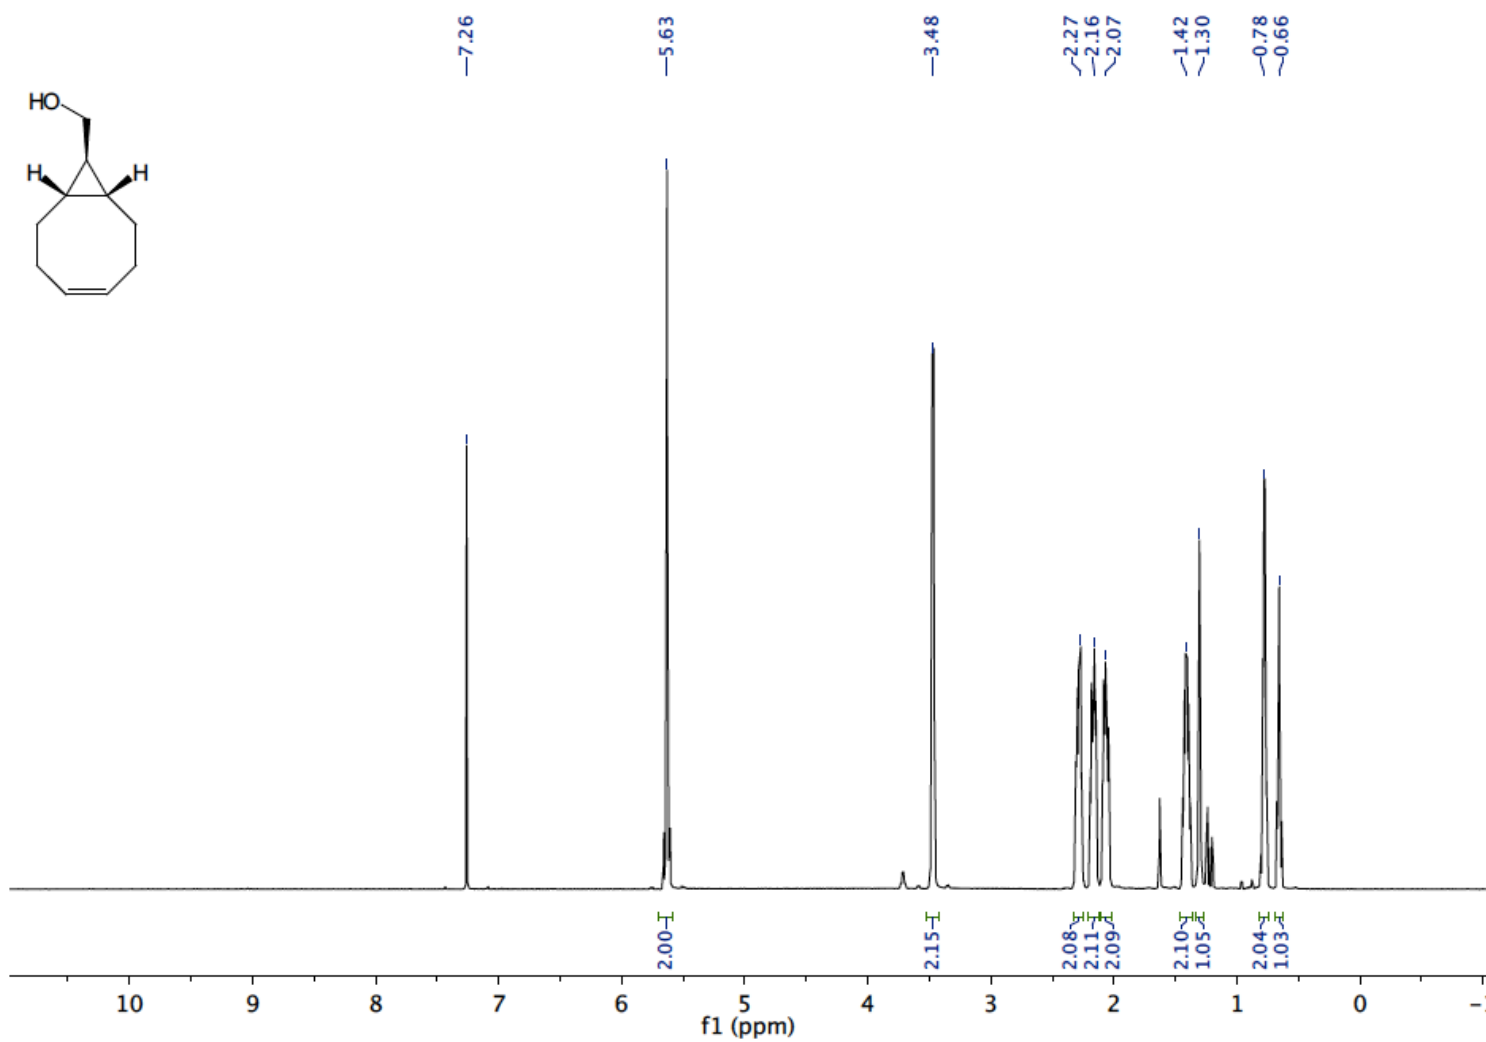

<sup>13</sup>C NMR spectrum of **4** (150 MHz, CDCl<sub>3</sub>)

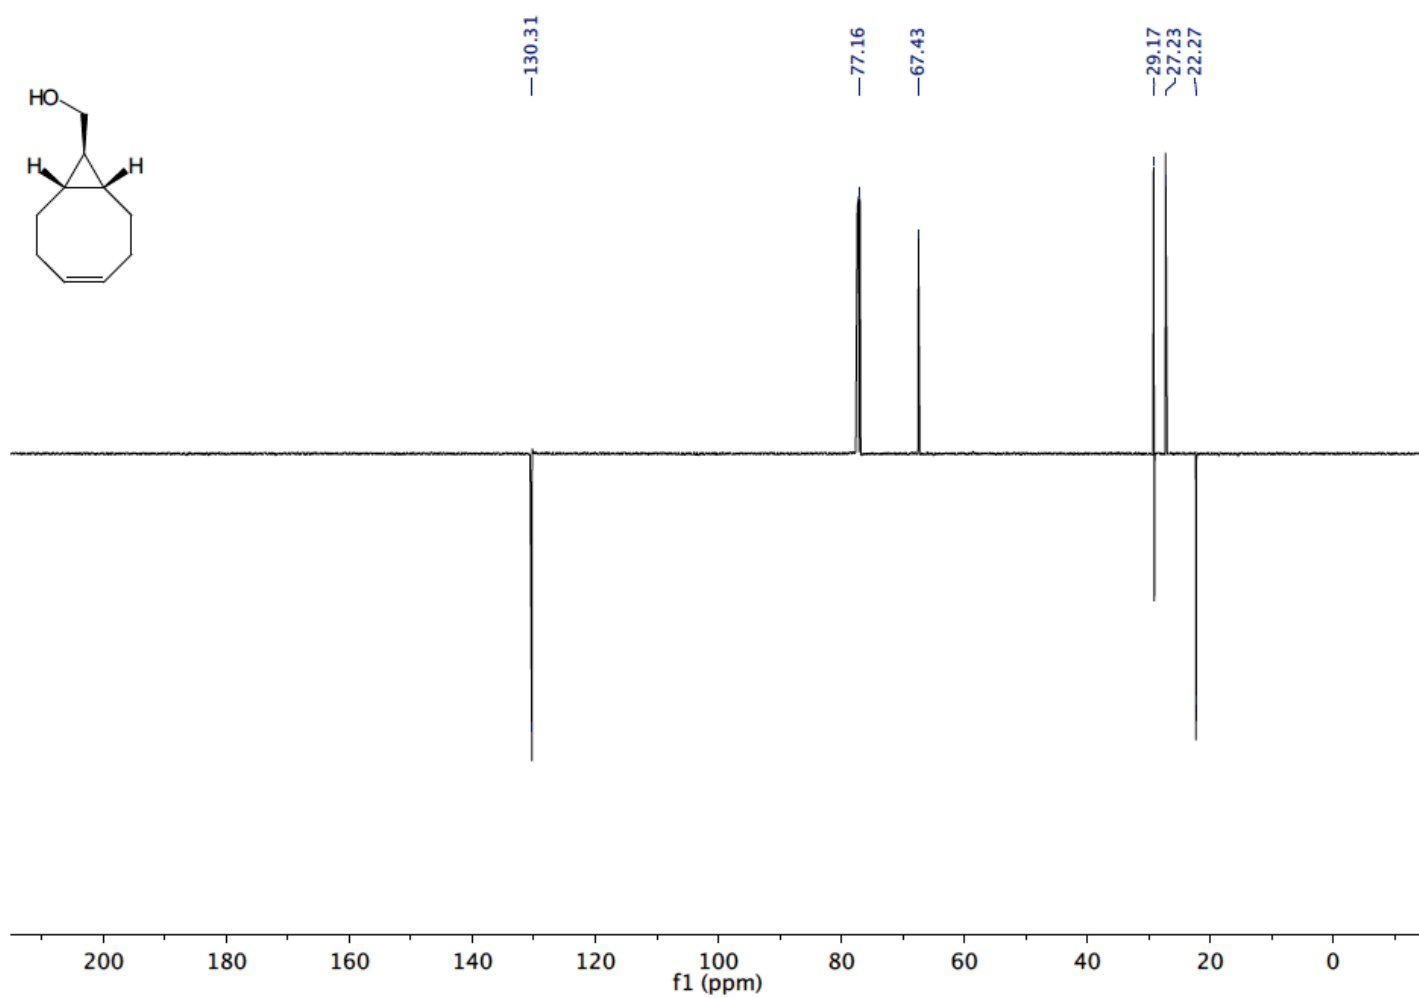

$^1\text{H}$  NMR spectrum of (*S*)-**BHTL** (600 MHz,  $(\text{CD}_3)_2\text{SO}$ )

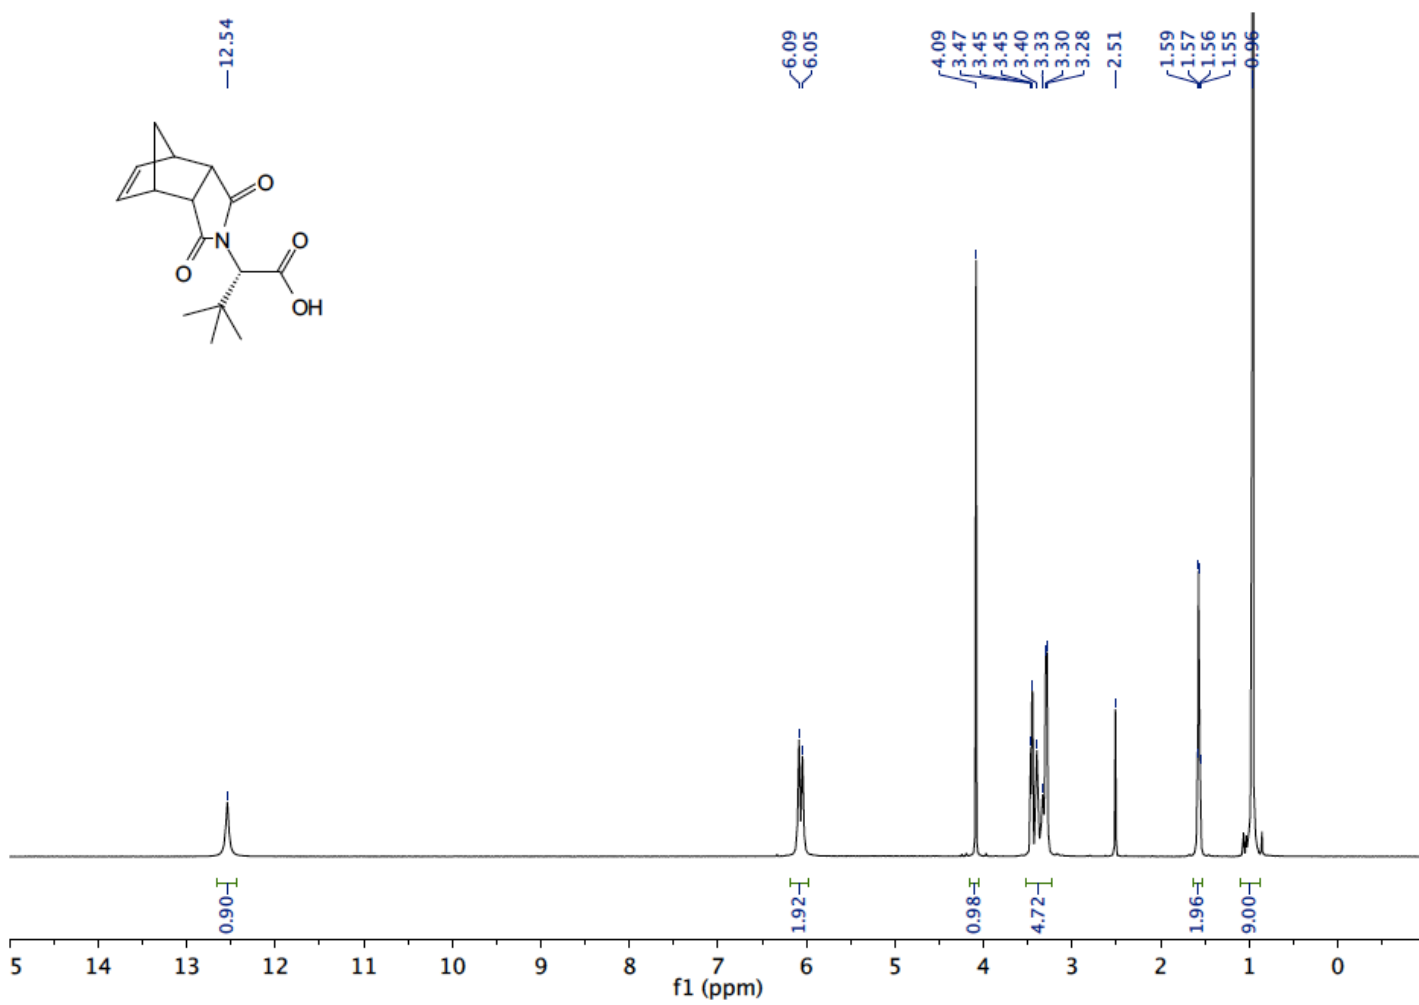

<sup>13</sup>C NMR spectrum of (*S*)-**BHTL** (150 MHz, (CD<sub>3</sub>)<sub>2</sub>SO)

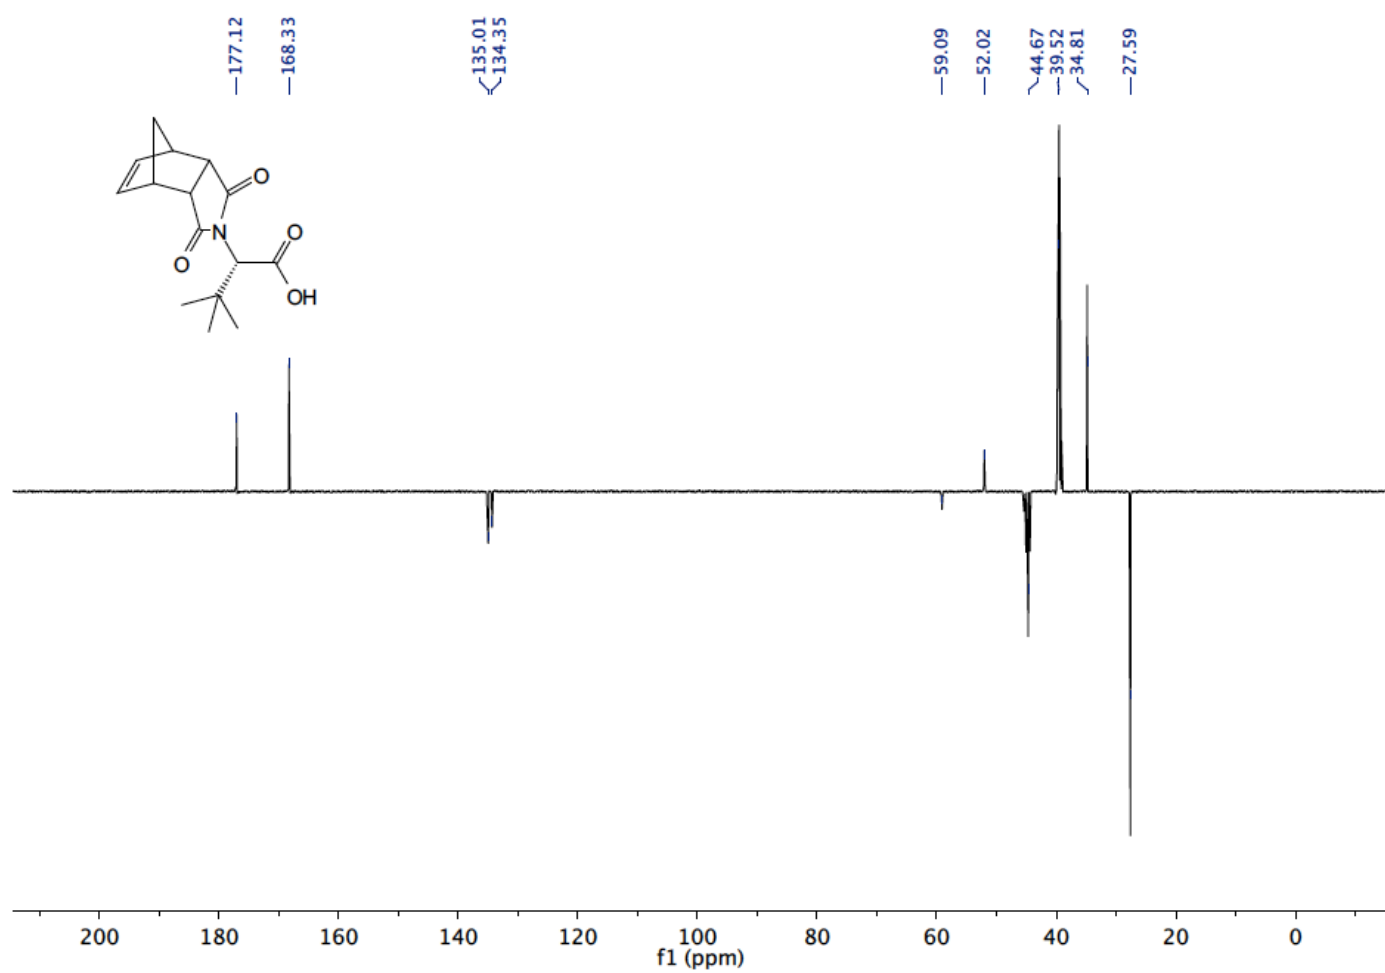

$^1\text{H}$  NMR spectrum of  $\text{Rh}_2(\text{S-BHTL})_4$ , room temperature (400 MHz,  $(\text{CD}_3)_2\text{SO}$ )

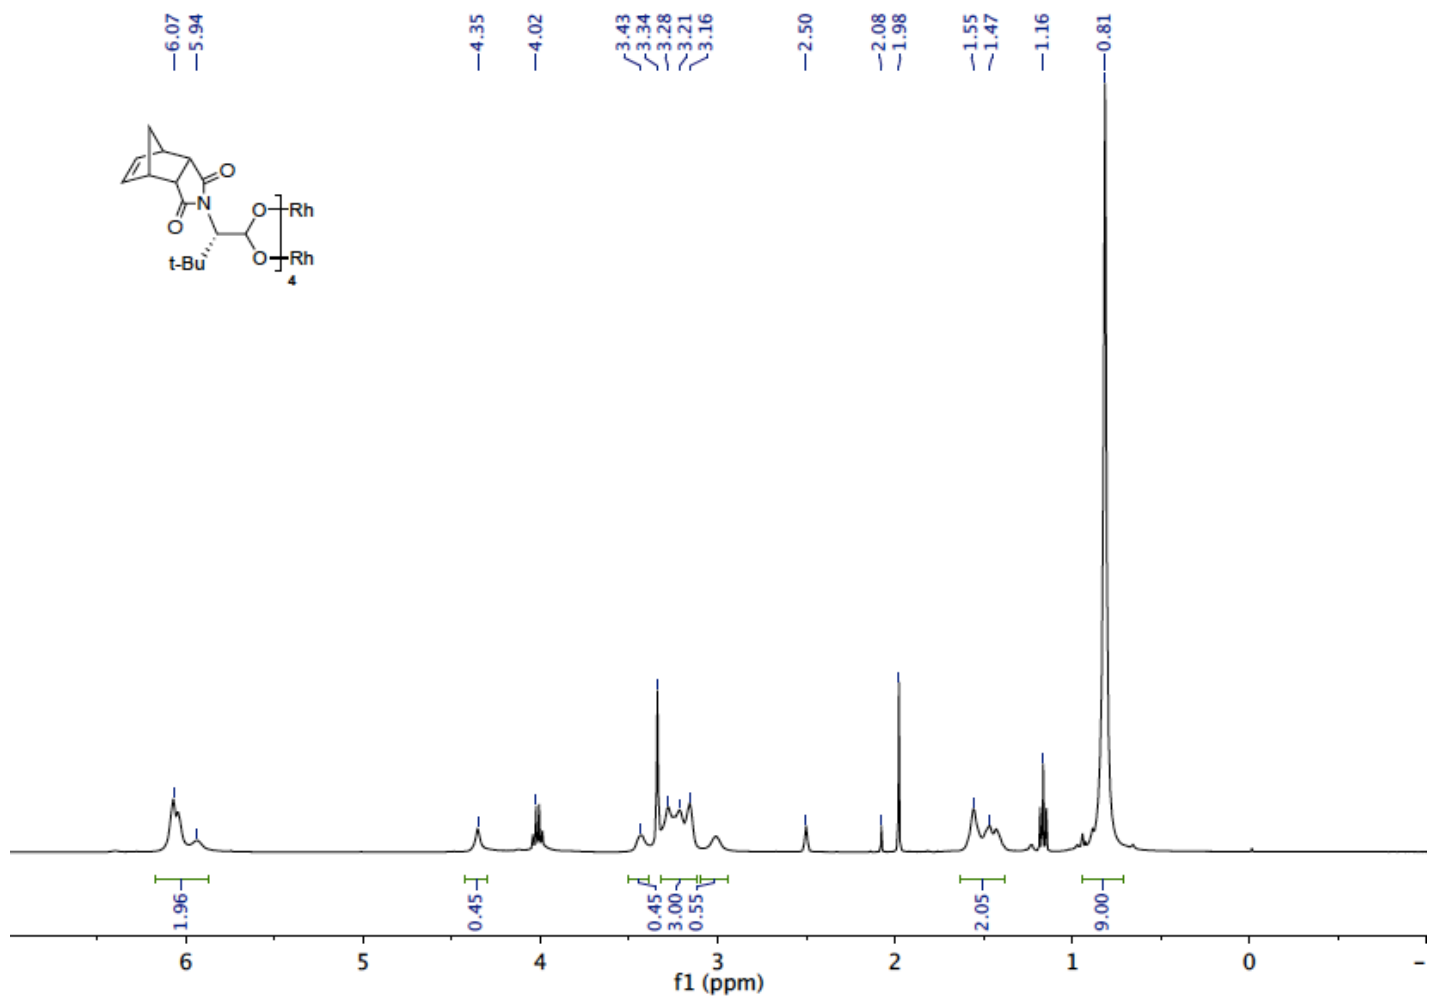

$^1\text{H}$  NMR spectrum of  $\text{Rh}_2(\text{S-BHTL})_4$  360K (400MHz,  $(\text{CD}_3)_2\text{SO}$ )

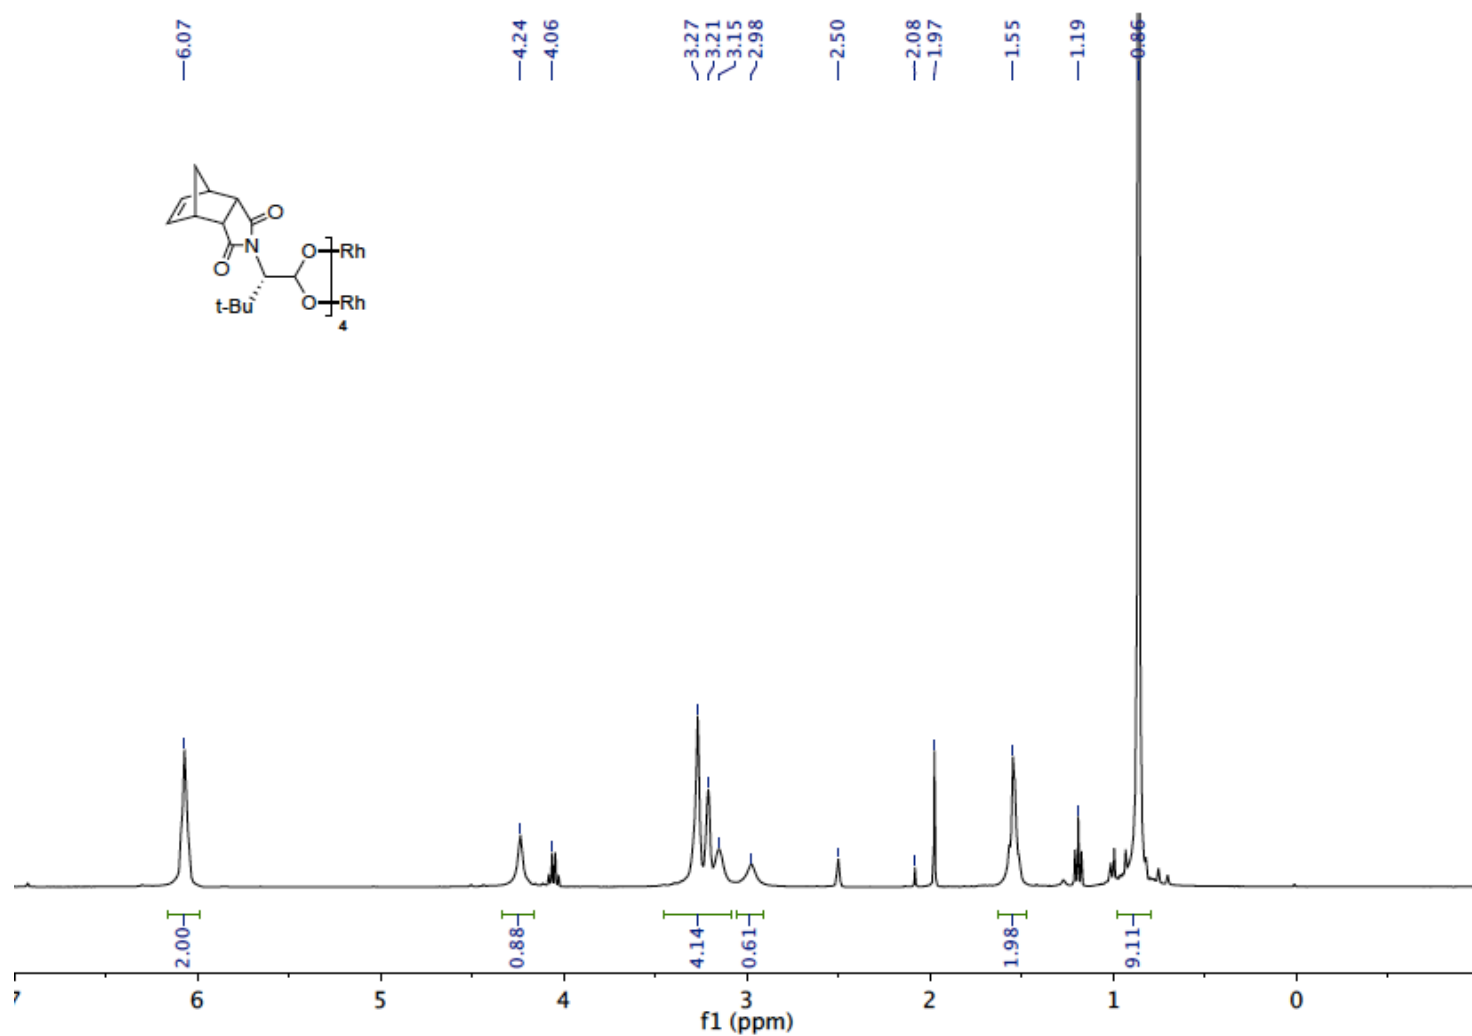

$^{13}\text{C}$  NMR spectrum of  $\text{Rh}_2(\text{S-BHTL})_4$  (600MHz,  $(\text{CD}_3)_2\text{SO}$ )

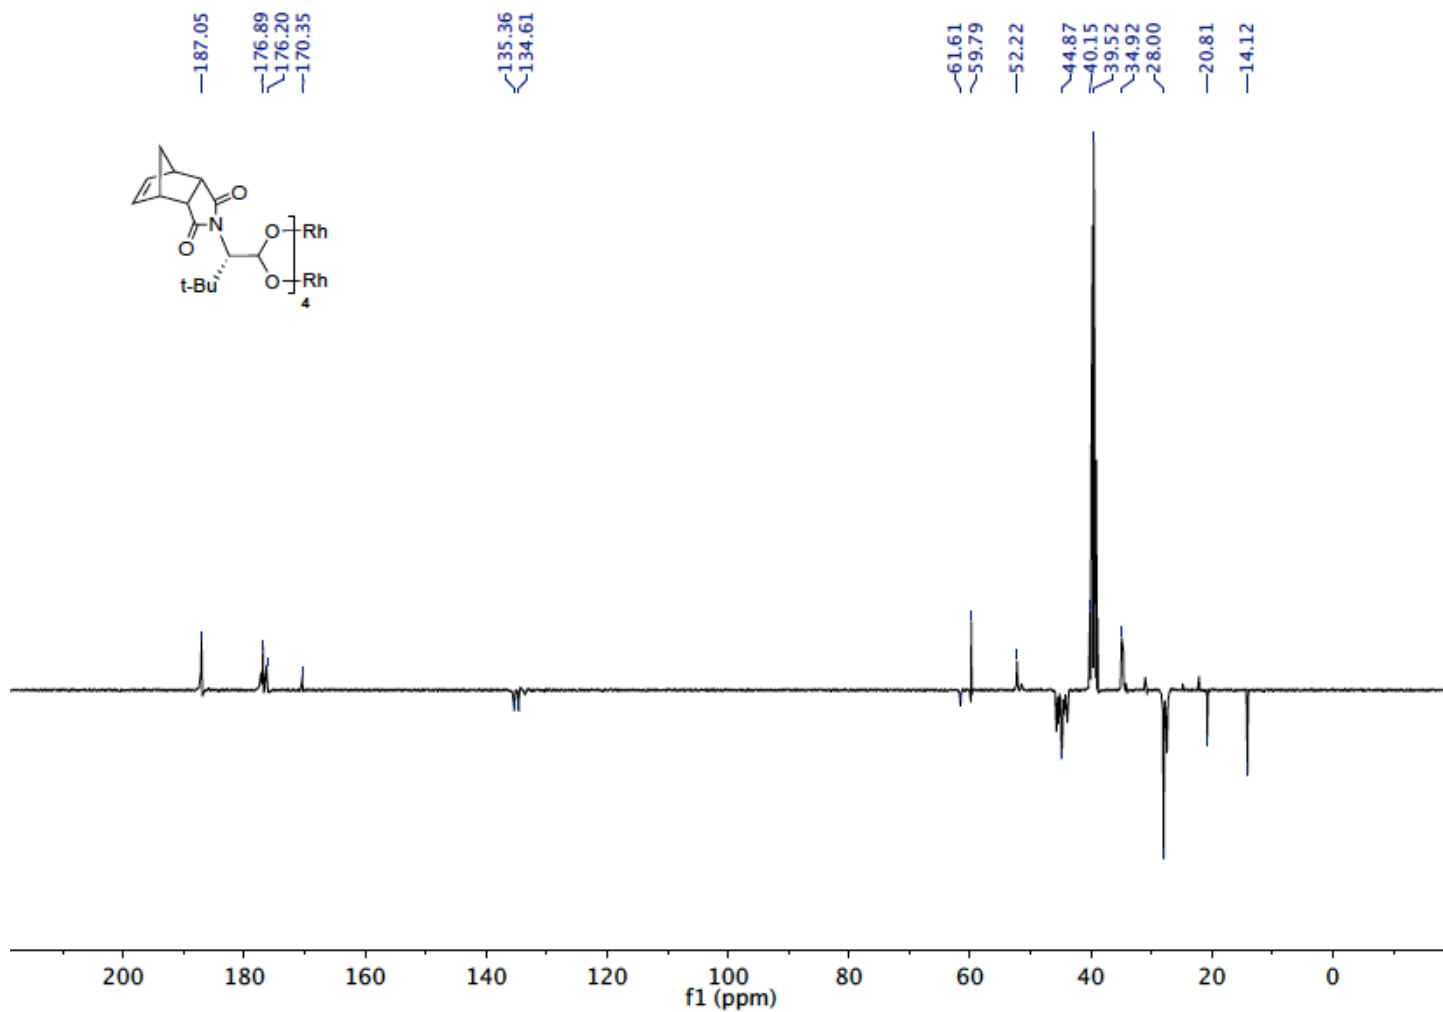



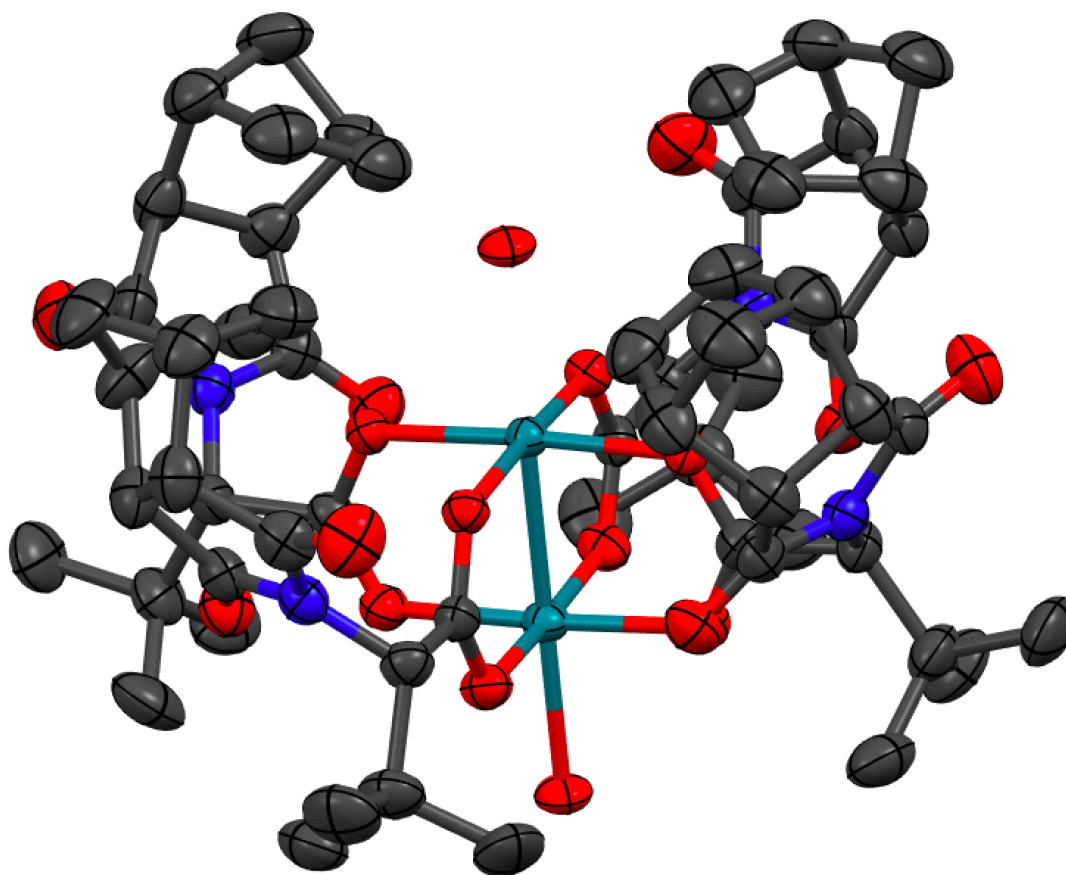

Fig S1. X-ray structure of Rh<sub>2</sub>(S-BHTL)<sub>4</sub> (50% probability ellipsoids)
